# Supplementary material
Source: PubMed Central journal article supplement (PMC2786001)
Supplement: pp.109.144683_6.pdf [file pp.109.144683_6.pdf]

|                                           |                               | Non-induced<br>leaf half area<br>(cm <sup>2</sup> ) | Induced leaf<br>half area (cm <sup>2</sup> ) | Total area<br>(cm <sup>2</sup> ) | Wilcoxon<br>Rank p<br>values |
|-------------------------------------------|-------------------------------|-----------------------------------------------------|----------------------------------------------|----------------------------------|------------------------------|
| Early<br>phase<br>leaves<br>(48h<br>p.i.) | Tet::EXP<br>treated leaf 9    | 37.35 ± 2.79                                        | 36.76 ± 1.83                                 | 74.11 ± 4.14                     | >0.4                         |
|                                           | Tet::EXP<br>untreated leaf 10 | 32.58 ± 3.72                                        | 32.29 ± 3.96                                 | 64.87 ± 7.63                     | >0.4                         |
|                                           | Tet::GUS<br>treated leaf 9    | 24.14 ± 2.59                                        | 22.76 ± 3.18                                 | 46.90 ± 5.62                     | >0.4                         |
|                                           | Tet::GUS<br>untreated leaf 10 | 22.82 ± 2.57                                        | 23.46 ± 2.56                                 | 46.28 ± 5.09                     | >0.4                         |
| Mid<br>phase<br>leaves<br>(48h<br>p.i.)   | Tet::EXP<br>treated leaf 9    | 157.75 ± 10.29                                      | 162.54 ± 9.80                                | 320.15 ±<br>19.92                | <0.05                        |
|                                           | Tet::EXP<br>untreated leaf 10 | 135.74 ± 9.26                                       | 134.85 ± 9.53                                | 270.59 ±<br>18.77                | >0.4                         |
|                                           | Tet::GUS<br>treated leaf 9    | 135.46 ± 2.94                                       | 128.58 ± 9.37                                | 264.04 ±<br>11.43                | >0.4                         |
|                                           | Tet::GUS<br>untreated leaf 10 | 120.96 ± 10.13                                      | 119.98 ± 10.41                               | 240.94 ±<br>20.49                | >0.4                         |
| Mid<br>phase<br>leaves<br>(flw)           | Tet::EXP<br>treated leaf 9    | 113.60 ± 4.35                                       | 124.10 ± 6.73                                | 237.70 ±<br>10.74                | <0.05                        |
|                                           | Tet::EXP<br>untreated leaf 10 | 181.10 ± 8.42                                       | 176.40 ± 8.67                                | 357.50 ±<br>16.79                | <0.2                         |
|                                           | Tet::GUS<br>treated leaf 9    | 114.40 ± 14.85                                      | 118.00 ± 13.67                               | 232.40 ±<br>27.91                | >0.4                         |
|                                           | Tet::GUS<br>untreated leaf 10 | 163.60 ± 16.90                                      | 165.20 ± 17.35                               | 328.80 ±<br>34.15                | >0.4                         |
| Late<br>phase<br>leaves<br>(48h<br>p.i.)  | Tet::EXP<br>treated leaf 9    | 270.05 ± 7.53                                       | 274.88 ± 5.78                                | 544.93 ±<br>12.92                | >0.4                         |
|                                           | Tet::EXP<br>untreated leaf 10 | 341.37 ± 6.67                                       | 335.10 ± 5.58                                | 676.47 ±<br>11.34                | <0.4                         |
|                                           | Tet::GUS<br>treated leaf 9    | 267.56 ± 6.37                                       | 259.82 ± 11.10                               | 527.38 ±<br>16.21                | >0.4                         |
|                                           | Tet::GUS<br>untreated leaf 10 | 314.34 ± 15.55                                      | 309.74 ± 17.00                               | 624.08 ±<br>32.36                | <0.4                         |

**Sloan Supplemental Table S1**
