# Supplementary material
Source: PubMed Central journal article supplement (PMC2786001)
Supplement: pp.109.144683_7.pdf [file pp.109.144683_7.pdf]

|        | Non-induced leaf half                 | Induced leaf half                     |
|--------|---------------------------------------|---------------------------------------|
|        | Mean number of cells mm <sup>-2</sup> | Mean number of cells mm <sup>-2</sup> |
| Tip    | 599.8 ± 38.3                          | 572.4 ± 22.2                          |
| Middle | 760.5 ± 39.7                          | 747.3 ± 50.0                          |
| Base   | 985.6 ± 57.2                          | 918.7 ± 51.1                          |

**Sloan Supplemental Table S2**
