# Supplementary material
Source: PubMed Central journal article supplement (PMC2786001)

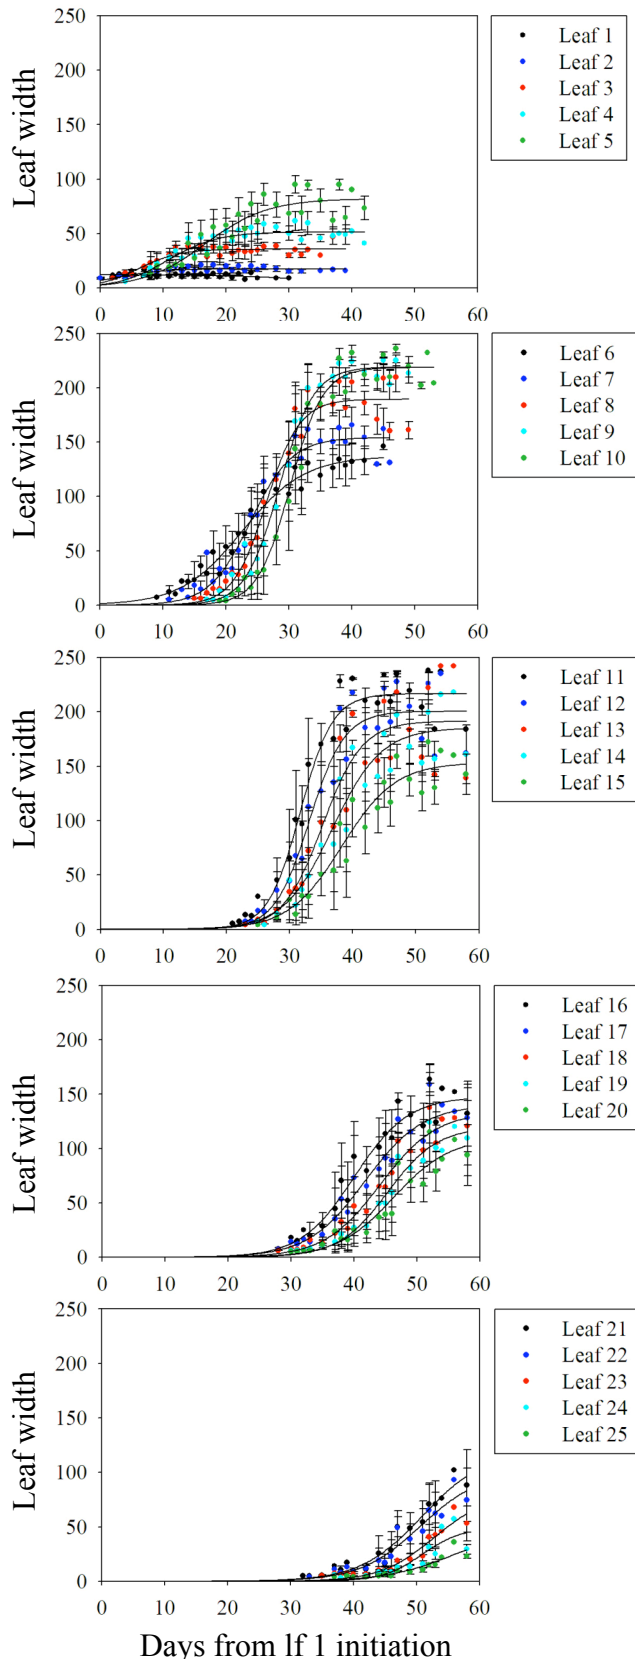

**Sloan Supplemental Figure S1**

Supplement: pp.109.144683_1.pdf [file pp.109.144683_1.pdf]

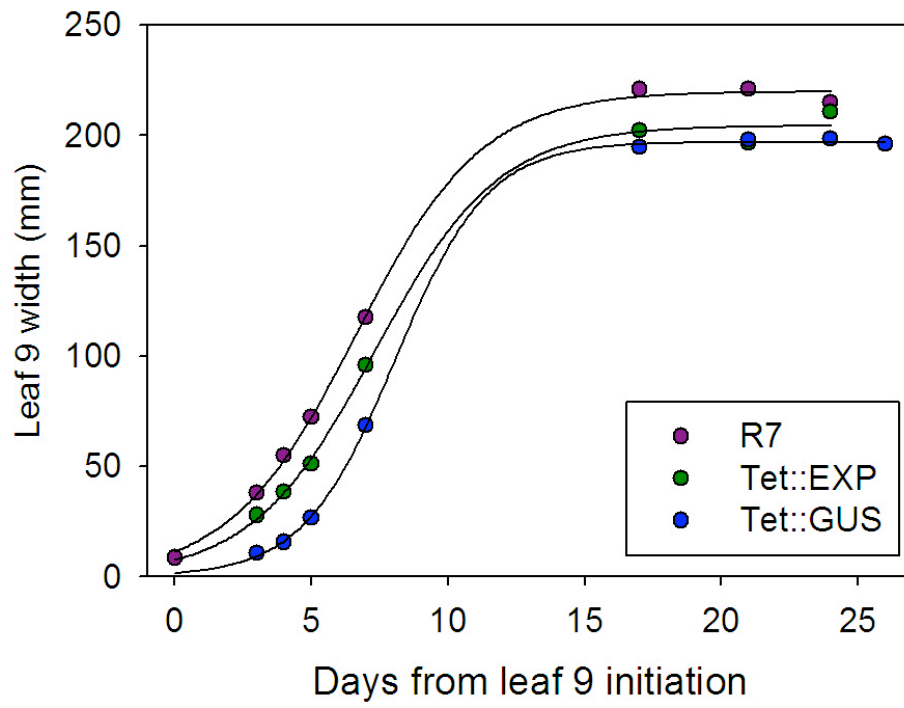

Supplemental Figure S2

Supplement: pp.109.144683_2.pdf [file pp.109.144683_2.pdf]

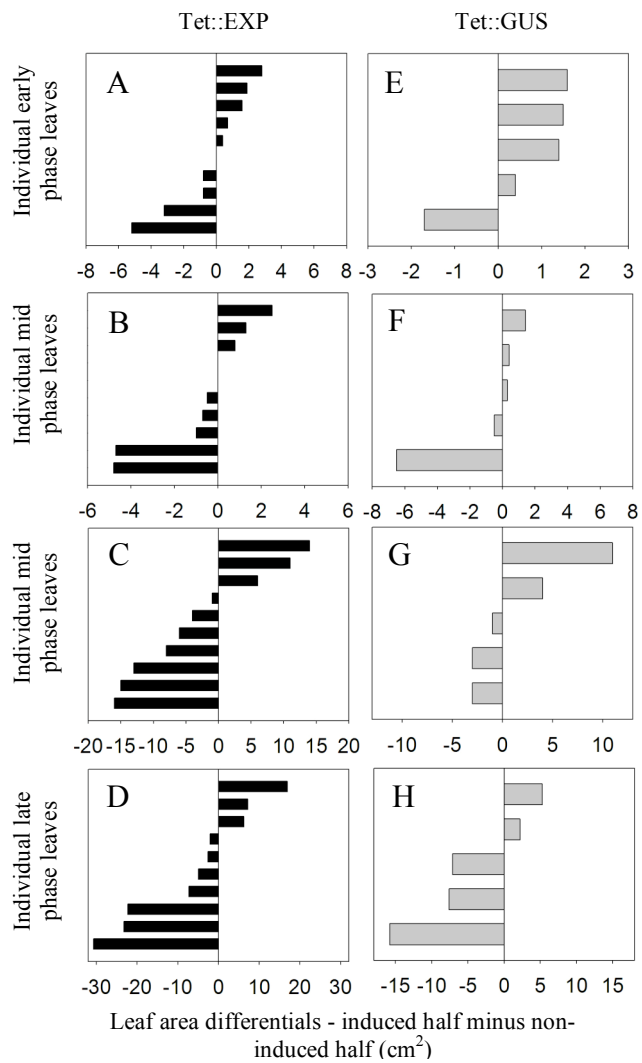

Sloan Supplemental Figure S3

Supplement: pp.109.144683_3.pdf [file pp.109.144683_3.pdf]

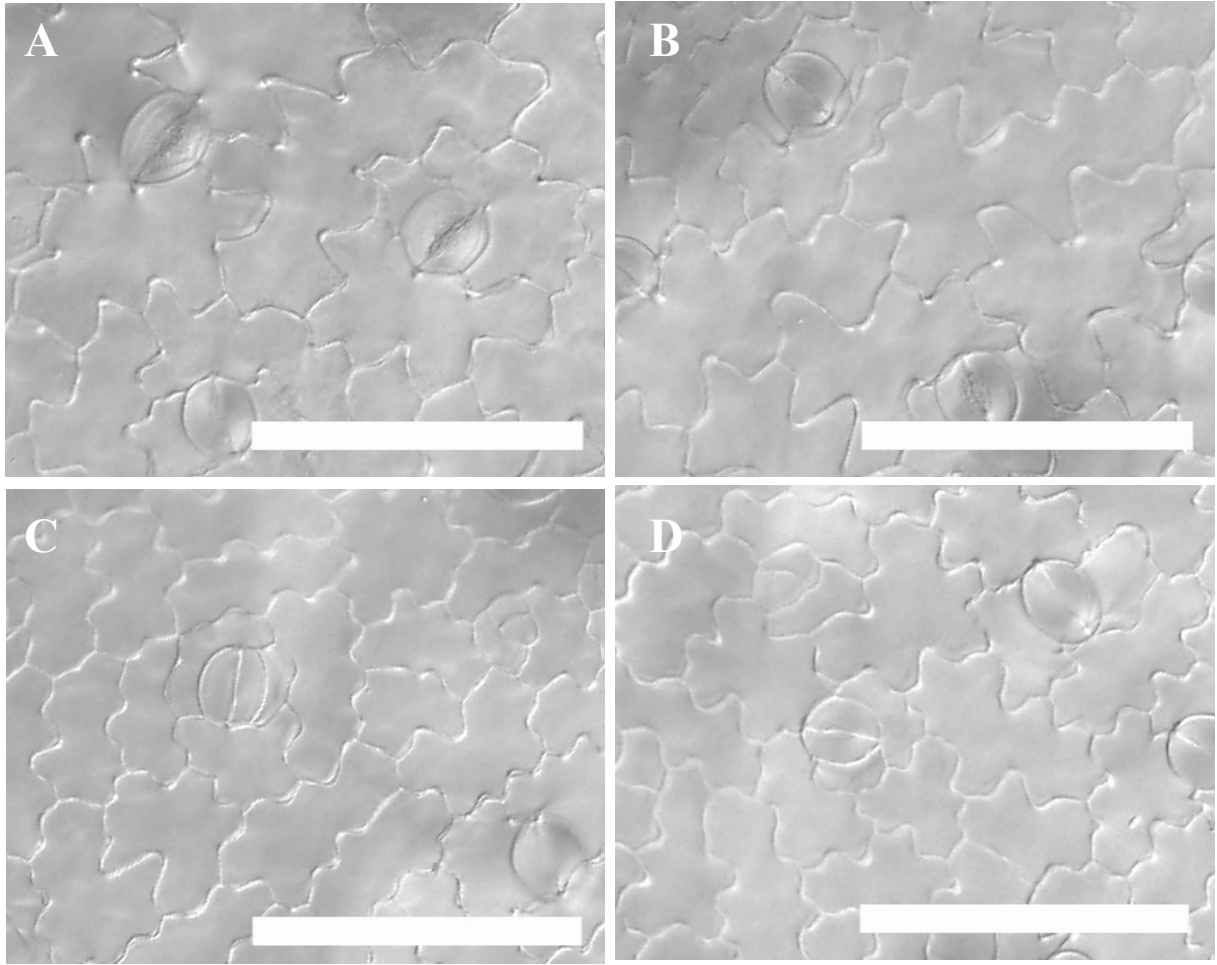

**Sloan Supplemental Figure S4**

Supplement: pp.109.144683_4.pdf [file pp.109.144683_4.pdf]

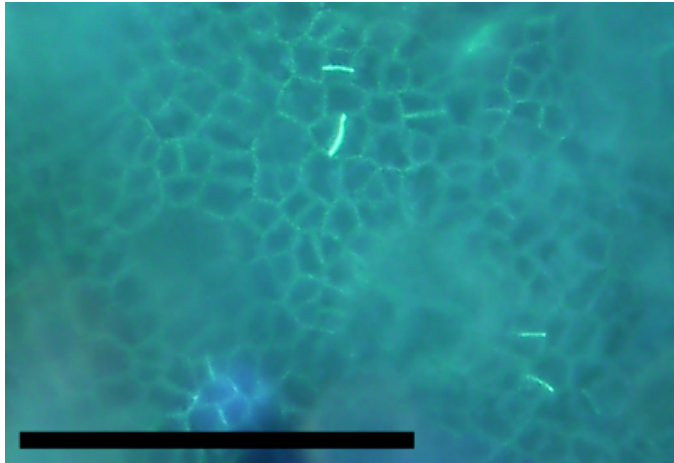

**Sloan Supplemental Figure S5**

Supplement: pp.109.144683_5.pdf [file pp.109.144683_5.pdf]
